# Supplementary material for: Bacterial zoonoses impacts to conservation of wildlife populations: a global synthesis
Source: Frontiers journal article supplement (doi:10.3389/fcosc.2023.1218153), 2023-11-23
Supplement: Data_Sheet_1.XLSX [file Data_Sheet_1.XLSX]

## Sheet: in
Pathogen name	Review Depth
Acinetobacter baumannii	All Articles Reviewed
Acinetobacter baylyi	All Articles Reviewed
Acinetobacter calcoaceticus	All Articles Reviewed
Acinetobacter lwoffii	All Articles Reviewed
Actinobacillus equuli	All Articles Reviewed
Actinobacillus pleuropneumoniae	All Articles Reviewed
Actinobacillus suis	All Articles Reviewed
Actinomyces bovis	All Articles Reviewed
Aeromonas dhakensis	All Articles Reviewed
Aeromonas hydrophila	All Articles Reviewed
Aeromonas sobria	All Articles Reviewed
Anaplasma phagocytophilum	Only first 200 articles Reviewed
Arcanobacterium haemolyticum	All Articles Reviewed
Arcobacter butzleri	All Articles Reviewed
Bacillus anthracis	All Articles Reviewed
Bacillus cereus	All Articles Reviewed
Bacillus licheniformis	Only first 200 articles Reviewed
Bacillus subtilis	All Articles Reviewed
Bacteroides fragilis	Only first 200 articles Reviewed
Bartonella alsatica	All Articles Reviewed
Bartonella baciliformis	All Articles Reviewed
Bartonella clarridgeiae	All Articles Reviewed
Bartonella elizabethae	All Articles Reviewed
Bartonella grahamii	All Articles Reviewed
Bartonella henselae	All Articles Reviewed
Bartonella koehlerae	All Articles Reviewed
Bartonella koehlerae koehlerae	All Articles Reviewed
Bartonella mayotimonensis	All Articles Reviewed
Bartonella quintana	All Articles Reviewed
Bartonella rochalimae	All Articles Reviewed
Bartonella tribocorum	All Articles Reviewed
Bartonella vinsonii berkhoffi	All Articles Reviewed
Bartonella washoensis	All Articles Reviewed
Bordetella avium	All Articles Reviewed
Bordetella bronchiseptica	All Articles Reviewed
Borrelia afzelii	Only first 200 articles Reviewed
Borrelia bavariensis	All Articles Reviewed
Borrelia bissettii	All Articles Reviewed
Borrelia burgdorferi s.s.	Only first 200 articles Reviewed
Borrelia crocidurae	All Articles Reviewed
Borrelia garinii	All Articles Reviewed
Borrelia hermsii	All Articles Reviewed
Borrelia hispanica	All Articles Reviewed
Borrelia lusitaniae	All Articles Reviewed
Borrelia mayonii	All Articles Reviewed
Borrelia miyamotoi	All Articles Reviewed
Borrelia parkeri	All Articles Reviewed
Borrelia persica	All Articles Reviewed
Borrelia spielmanii	All Articles Reviewed
Borrelia turicatae	All Articles Reviewed
Borrelia valaisiana	All Articles Reviewed
Brachyspira aalborgi	All Articles Reviewed
Brachyspira pilosicoli	All Articles Reviewed
Brucella abortus	Only first 200 articles Reviewed
Brucella canis	Only first 200 articles Reviewed
Brucella ceti	All Articles Reviewed
Brucella melitensis	All Articles Reviewed
Brucella neotomae	All Articles Reviewed
Brucella ovis	All Articles Reviewed
Brucella pinnipediae	All Articles Reviewed
Brucella suis	Only first 200 articles Reviewed
Burkholderia cepacia	All Articles Reviewed
Burkholderia mallei	All Articles Reviewed
Burkholderia pseudomallei	All Articles Reviewed
Campylobacter coli	All Articles Reviewed
Campylobacter fetus	All Articles Reviewed
Campylobacter hyointestinalis	All Articles Reviewed
Campylobacter jejuni	All Articles Reviewed
Campylobacter lari	All Articles Reviewed
Campylobacter sputorum	All Articles Reviewed
Campylobacter upsaliensis	All Articles Reviewed
Chlamydia abortus	Only first 200 articles Reviewed
Chlamydia felis	All Articles Reviewed
Chlamydia gallinacea	All Articles Reviewed
Chlamydia pneumoniae	All Articles Reviewed
Chlamydia psittaci	All Articles Reviewed
Chlamydia suis	All Articles Reviewed
Chlamydia trachomatis	All Articles Reviewed
Chromobacterium violaceum	All Articles Reviewed
Citrobacter amalonaticus	All Articles Reviewed
Citrobacter braakii	All Articles Reviewed
Citrobacter freundii	Only first 200 articles Reviewed
Citrobacter sedlakii	All Articles Reviewed
Citrobacter youngae	All Articles Reviewed
Clostridium baratii	All Articles Reviewed
Clostridium bifermentans	All Articles Reviewed
Clostridium botulinum	All Articles Reviewed
Clostridium chauvoei	All Articles Reviewed
Clostridium difficile	All Articles Reviewed
Clostridium novyi	All Articles Reviewed
Clostridium paraputrificum	All Articles Reviewed
Clostridium perfringens	All Articles Reviewed
Clostridium septicum	All Articles Reviewed
Clostridium sporogenes	All Articles Reviewed
Clostridium subterminale	All Articles Reviewed
Clostridium tertium	All Articles Reviewed
Clostridium tetani	All Articles Reviewed
Corynebacterium amycolatum	All Articles Reviewed
Corynebacterium diphtheriae	All Articles Reviewed
Corynebacterium falsenii	All Articles Reviewed
Corynebacterium kroppenstedtii	All Articles Reviewed
Corynebacterium kutscheri	All Articles Reviewed
Corynebacterium macginleyi	All Articles Reviewed
Corynebacterium pseudotuberculosis	Only first 200 articles Reviewed
Corynebacterium ulcerans	All Articles Reviewed
Coxiella burnetii	All Articles Reviewed
Dermatophilus congolensis	All Articles Reviewed
Dichelobacter nodosus	Only first 200 articles Reviewed
Edwardsiella hoshinae	All Articles Reviewed
Edwardsiella tarda	Only first 200 articles Reviewed
Ehrlichia canis	All Articles Reviewed
Ehrlichia chaffeensis	Only first 200 articles Reviewed
Ehrlichia ewingii	All Articles Reviewed
Ehrlichia muris	All Articles Reviewed
Ehrlichia ruminantium	Only first 200 articles Reviewed
Eikenella corrodens	All Articles Reviewed
Elizabethkingia meningoseptica	All Articles Reviewed
Enterobacter amnigenus	All Articles Reviewed
Enterobacter cancerogenus	All Articles Reviewed
Enterobacter cloacae	Only first 200 articles Reviewed
Enterobacter hormaechei	All Articles Reviewed
Enterococcus faecalis	All Articles Reviewed
Enterococcus faecium	All Articles Reviewed
Enterococcus hirae	Only first 200 articles Reviewed
Enterococcus thailandicus	All Articles Reviewed
Erysipelothrix rhusiopathiae	Only first 200 articles Reviewed
Escherichia albertii	All Articles Reviewed
Escherichia coli	Only first 200 articles Reviewed
Escherichia fergusonii	All Articles Reviewed
Escherichia vulneris	All Articles Reviewed
Flavobacterium ceti	All Articles Reviewed
Francisella tularensis	All Articles Reviewed
Francisella tularensis holarctica	All Articles Reviewed
Fusobacterium necrophorum	Only first 200 articles Reviewed
Fusobacterium varium	All Articles Reviewed
Hafnia alvei	All Articles Reviewed
Helicobacter brantae	All Articles Reviewed
Helicobacter canadensis	All Articles Reviewed
Helicobacter cinaedi	All Articles Reviewed
Helicobacter equorum	All Articles Reviewed
Helicobacter felis	Only first 200 articles Reviewed
Helicobacter heilmannii	All Articles Reviewed
Helicobacter hepaticus	Only first 200 articles Reviewed
Helicobacter pullorum	All Articles Reviewed
Helicobacter pylori	All Articles Reviewed
Helicobacter rodentium	All Articles Reviewed
Helicobacter suis	All Articles Reviewed
Klebsiella aerogenes	All Articles Reviewed
Klebsiella oxytoca	All Articles Reviewed
Klebsiella pneumoniae	All Articles Reviewed
Klebsiella variicola	All Articles Reviewed
Kluyvera ascorbata	All Articles Reviewed
Kytococcus schroeteri	All Articles Reviewed
Leptospira borgpetersenii	Only first 200 articles Reviewed
Leptospira fainei	All Articles Reviewed
Leptospira inadai	All Articles Reviewed
Leptospira interrogans	Only first 200 articles Reviewed
Leptospira kirschneri	All Articles Reviewed
Leptospira licerasiae	All Articles Reviewed
Leptospira mayottensis	All Articles Reviewed
Leptospira noguchii	All Articles Reviewed
Leptospira santarosai	All Articles Reviewed
Leptospira weilii	All Articles Reviewed
Listeria innocua	Only first 200 articles Reviewed
Listeria ivanovii	All Articles Reviewed
Listeria monocytogenes	All Articles Reviewed
Listeria seeligeri	All Articles Reviewed
Listeria welshimeri	All Articles Reviewed
Mannheimia haemolytica	All Articles Reviewed
Moraxella bovis	All Articles Reviewed
Moraxella ovis	All Articles Reviewed
Morganella morganii	All Articles Reviewed
Mycobacterium abscessus	All Articles Reviewed
Mycobacterium africanum	All Articles Reviewed
Mycobacterium arupense	All Articles Reviewed
Mycobacterium asiaticum	All Articles Reviewed
Mycobacterium aurum	All Articles Reviewed
Mycobacterium avium avium	Only first 200 articles Reviewed
Mycobacterium avium hominissuis	All Articles Reviewed
Mycobacterium bohemicum	All Articles Reviewed
Mycobacterium bolletii	All Articles Reviewed
Mycobacterium bovis	Only first 200 articles Reviewed
Mycobacterium caprae	All Articles Reviewed
Mycobacterium celatum	All Articles Reviewed
Mycobacterium chelonae	All Articles Reviewed
Mycobacterium chitae	All Articles Reviewed
Mycobacterium colombiense	All Articles Reviewed
Mycobacterium confluentis	All Articles Reviewed
Mycobacterium duvalii	All Articles Reviewed
Mycobacterium elephantis	All Articles Reviewed
Mycobacterium flavescens	All Articles Reviewed
Mycobacterium fortuitum	All Articles Reviewed
Mycobacterium gastri	All Articles Reviewed
Mycobacterium genavense	All Articles Reviewed
Mycobacterium gilvum	All Articles Reviewed
Mycobacterium goodii	All Articles Reviewed
Mycobacterium gordonae	All Articles Reviewed
Mycobacterium haemophilum	All Articles Reviewed
Mycobacterium holsaticum	All Articles Reviewed
Mycobacterium interjectum	All Articles Reviewed
Mycobacterium intermedium	All Articles Reviewed
Mycobacterium intracellulare	Only first 200 articles Reviewed
Mycobacterium kansasii	All Articles Reviewed
Mycobacterium lentiflavum	All Articles Reviewed
Mycobacterium leprae	Only first 200 articles Reviewed
Mycobacterium lepromatosis	All Articles Reviewed
Mycobacterium mageritense	All Articles Reviewed
Mycobacterium mantenii	All Articles Reviewed
Mycobacterium marinum	Only first 200 articles Reviewed
Mycobacterium microti	All Articles Reviewed
Mycobacterium moriokaense	All Articles Reviewed
Mycobacterium mucogenicum	All Articles Reviewed
Mycobacterium neoaurum	All Articles Reviewed
Mycobacterium nonchromogenicum	All Articles Reviewed
Mycobacterium orygis	All Articles Reviewed
Mycobacterium palustre	All Articles Reviewed
Mycobacterium parafortuitum	All Articles Reviewed
Mycobacterium parascrofulaceum	All Articles Reviewed
Mycobacterium peregrinum	All Articles Reviewed
Mycobacterium phlei	All Articles Reviewed
Mycobacterium pinnipedii	All Articles Reviewed
Mycobacterium porcinum	All Articles Reviewed
Mycobacterium scrofulaceum	All Articles Reviewed
Mycobacterium septicum	All Articles Reviewed
Mycobacterium simiae	All Articles Reviewed
Mycobacterium smegmatis	Only first 200 articles Reviewed
Mycobacterium szulgai	All Articles Reviewed
Mycobacterium terrae	All Articles Reviewed
Mycobacterium thermoresistibile	All Articles Reviewed
Mycobacterium triviale	All Articles Reviewed
Mycobacterium tuberculosis	Only first 200 articles Reviewed
Mycobacterium ulcerans	All Articles Reviewed
Mycobacterium vaccae	All Articles Reviewed
Mycobacterium virginiense	All Articles Reviewed
Mycobacterium vulneris	All Articles Reviewed
Mycobacterium xenopi	All Articles Reviewed
Mycoplasma arginini	All Articles Reviewed
Mycoplasma felis	Only first 200 articles Reviewed
Mycoplasma hominis	All Articles Reviewed
Mycoplasma lipofaciens	All Articles Reviewed
Mycoplasma phocicerebrale	All Articles Reviewed
Mycoplasma pneumoniae	All Articles Reviewed
Necropsobacter rosorum	All Articles Reviewed
Neisseria animaloris	All Articles Reviewed
Nocardia asteroides	All Articles Reviewed
Nocardia brasiliensis	All Articles Reviewed
Nocardia caviae	All Articles Reviewed
Nocardia cyriacigeorgica	All Articles Reviewed
Nocardia farcinica	All Articles Reviewed
Nocardia nova	All Articles Reviewed
Nocardia otitidiscaviarum	All Articles Reviewed
Orientia tsutsugamushi	All Articles Reviewed
Paeniclostridium sordelli	All Articles Reviewed
Pantoea agglomerans	All Articles Reviewed
Pasteurella aerogenes	All Articles Reviewed
Pasteurella canis	All Articles Reviewed
Pasteurella dagmatis	All Articles Reviewed
Pasteurella multocida	All Articles Reviewed
Pasteurella oralis	All Articles Reviewed
Pasteurella pneumotropica	All Articles Reviewed
Photobacterium damselae damselae	All Articles Reviewed
Photobacterium damselae piscicida	All Articles Reviewed
Plesiomonas shigelloides	All Articles Reviewed
Porphyromonas gingivalis	All Articles Reviewed
Porphyromonas macacae	All Articles Reviewed
Proteus mirabilis	Only first 200 articles Reviewed
Proteus penneri	All Articles Reviewed
Proteus vulgaris	All Articles Reviewed
Providencia alcalifaciens	All Articles Reviewed
Providencia heimbachae	All Articles Reviewed
Providencia rettgeri	All Articles Reviewed
Providencia stuartii	All Articles Reviewed
Pseudomonas aeruginosa	All Articles Reviewed
Pseudomonas fluorescens	Only first 200 articles Reviewed
Pseudomonas fulva	All Articles Reviewed
Pseudomonas mendocina	All Articles Reviewed
Pseudomonas monteilii	All Articles Reviewed
Pseudomonas putida	Only first 200 articles Reviewed
Rhodococcus equi	Only first 200 articles Reviewed
Rickettsia africae	All Articles Reviewed
Rickettsia akari	All Articles Reviewed
Rickettsia amblyommatis	All Articles Reviewed
Rickettsia australis	All Articles Reviewed
Rickettsia bellii	All Articles Reviewed
Rickettsia conorii	All Articles Reviewed
Rickettsia felis	Only first 200 articles Reviewed
Rickettsia heilongjiangensis	All Articles Reviewed
Rickettsia helvetica	All Articles Reviewed
Rickettsia honei	All Articles Reviewed
Rickettsia japonica	All Articles Reviewed
Rickettsia massiliae	All Articles Reviewed
Rickettsia monacensis	All Articles Reviewed
Rickettsia parkeri	All Articles Reviewed
Rickettsia prowazekii	All Articles Reviewed
Rickettsia raoultii	All Articles Reviewed
Rickettsia rhipicephali	All Articles Reviewed
Rickettsia rickettsii	Only first 200 articles Reviewed
Rickettsia sibirica	All Articles Reviewed
Rickettsia slovaca	All Articles Reviewed
Rickettsia tamurae	All Articles Reviewed
Rickettsia typhi	All Articles Reviewed
Salmonella bongori	All Articles Reviewed
Salmonella enterica arizonae	All Articles Reviewed
Salmonella enterica diarizonae	All Articles Reviewed
Salmonella enterica enterica	Only first 200 articles Reviewed
Salmonella enterica houtenae	All Articles Reviewed
Salmonella enterica salamae	All Articles Reviewed
Segniliparus rugosus	All Articles Reviewed
Serratia fonticola	All Articles Reviewed
Serratia marcescens	Only first 200 articles Reviewed
Shigella boydii	All Articles Reviewed
Shigella dysenteriae	All Articles Reviewed
Shigella flexneri	Only first 200 articles Reviewed
Shigella sonnei	All Articles Reviewed
Staphylococcus aureus	Only first 200 articles Reviewed
Staphylococcus capitis	All Articles Reviewed
Staphylococcus cohnii	All Articles Reviewed
Staphylococcus epidermidis	All Articles Reviewed
Staphylococcus haemolyticus	Only first 200 articles Reviewed
Staphylococcus hominis	All Articles Reviewed
Staphylococcus intermedius	All Articles Reviewed
Staphylococcus pasteuri	All Articles Reviewed
Staphylococcus saprophyticus	All Articles Reviewed
Staphylococcus sciuri	Only first 200 articles Reviewed
Staphylococcus simulans	All Articles Reviewed
Staphylococcus warneri	All Articles Reviewed
Staphylococcus xylosus	Only first 200 articles Reviewed
Stenotrophomonas maltophilia	All Articles Reviewed
Streptobacillus felis	All Articles Reviewed
Streptobacillus moniliformis	All Articles Reviewed
Streptobacillus notomytis	All Articles Reviewed
Streptococcus agalactiae	All Articles Reviewed
Streptococcus canis	All Articles Reviewed
Streptococcus dysgalactiae	Only first 200 articles Reviewed
Streptococcus equi zooepidemicus	Only first 200 articles Reviewed
Streptococcus equinus	All Articles Reviewed
Streptococcus gallolyticus	All Articles Reviewed
Streptococcus halichoeri	All Articles Reviewed
Streptococcus infantarius	All Articles Reviewed
Streptococcus iniae	Only first 200 articles Reviewed
Streptococcus pasteurianus	All Articles Reviewed
Streptococcus pneumoniae	All Articles Reviewed
Streptococcus pyogenes	All Articles Reviewed
Streptococcus suis	All Articles Reviewed
Streptococcus uberis	All Articles Reviewed
Treponema pallidum	All Articles Reviewed
Trueperella pyogenes	Only first 200 articles Reviewed
Vibrio alginolyticus	All Articles Reviewed
Vibrio cholerae	All Articles Reviewed
Vibrio fluvialis	All Articles Reviewed
Vibrio metschnikovii	All Articles Reviewed
Vibrio mimicus	All Articles Reviewed
Vibrio parahaemolyticus	All Articles Reviewed
Vibrio vulnificus	Only first 200 articles Reviewed
Weissella confusa	All Articles Reviewed
Wohlfahrtiimonas chitiniclastica	All Articles Reviewed
Yersinia aleksiciae	All Articles Reviewed
Yersinia bercovieri	All Articles Reviewed
Yersinia enterocolitica	All Articles Reviewed
Yersinia frederiksenii	All Articles Reviewed
Yersinia intermedia	All Articles Reviewed
Yersinia kristensenii	All Articles Reviewed
Yersinia pestis	Only first 200 articles Reviewed
Yersinia pseudotuberculosis	Only first 200 articles Reviewed
Yersinia rohdei	All Articles Reviewed
Yersinia ruckeri	Only first 200 articles Reviewed
